# Supplementary material for: A survey of travel behaviour among scientists in Germany and the potential for change
Source: eLife. 2020 May 28;9:e56765. doi: 10.7554/eLife.56765 (PMC7255798; doi:10.7554/eLife.56765)
Supplement: Figure 1—source data 1. [file elife-56765-fig1-data1.xlsx]

## Sheet: R_Gender
Q2 - Which gender identity do you identify most with?
Female				Percentage
Female		Female	130	0.572687	57.3
Female		Male	96	0.422907	42.3
Female		prefer not to say	1	0.00440529	0.4
prefer not to answer			227	1	100
Male
Male
Male
Female
Male
Female
Male
Male
Female
Female
Female
Female
Female
Female
Female
Male
Male
Female
Male
Female
Female
Male
Female
Female
Female
Female
Female
Male
Female
Female
Male
Female
Male
Female
Male
Male
Female
Male
Female
Male
Female
Male
Male
Female
Female
Male
Female
Female
Male
Female
Female
Female
Female
Female
Male
Female
Female
Male
Male
Male
Male
Male
Female
Female
Male
Female
Female
Female
Female
Female
Male
Female
Female
Female
Male
Female
Female
Female
Female
Female
Female
Female
Male
Female
Female
Male
Male
Male
Female
Male
Female
Female
Female
Female
Male
Male
Female
Female
Male
Male
Female
Male
Female
Male
Male
Female
Male
Male
Female
Female
Male
Female
Female
Male
Male
Male
Male
Male
Male
Female
Female
Female
Male
Female
Male
Male
Female
Female
Male
Female
Male
Female
Female
Male
Female
Female
Female
Female
Male
Male
Female
Male
Female
Female
Female
Female
Female
Female
Female
Female
Female
Female
Female
Female
Male
Male
Male
Male
Female
Female
Female
Male
Female
Female
Male
Female
Male
Female
Male
Male
Male
Male
Female
Female
Female
Male
Female
Male
Male
Male
Female
Female
Female
Male
Female
Male
Female
Male
Female
Male
Female
Male
Male
Female
Male
Female
Female
Male
Male
Male
Male
Male
Male
Female
Female
Female
Male
Male
Male
Female
Female
Female
Female
Female
Female
Male
Male
Male
Female
Female
Male
Male

## Sheet: R_Career Stage
Q7 - What is your academic position?
PhD			Number	Percentage
PhD		PhD	105	0.462555	46.3
PhD student		Postdoc	79	0.348018	34.8
PhD student		PI	42	0.185022	18.5
PhD student		n/a	1	0.00440529
PhD student			227	1
PhD student
Postdoc
PhD student
Postdoc
Postdoc
PI/Group Leader
Postdoc
PhD student
PhD student
Postdoc
Postdoc
Postdoc
PhD student
Postdoc
Postdoc
PhD student
PhD student
PhD student
PhD student
PhD student
PhD student
PhD student
PhD student
PI/Group Leader
PhD student
Postdoc
PhD student
PhD student
PhD student
Postdoc
PhD student
Postdoc
PhD student
Postdoc
PhD student
PhD student
PhD student
PhD student
PhD student
PhD student
PhD student
PhD student
Postdoc
PhD student
PhD student
PhD student
PhD student
Postdoc
PhD student
PhD student
PhD student
PhD student
PhD student
PhD student
PhD student
PhD student
PhD student
PhD student
Postdoc
PhD student
Postdoc
PhD student
PhD student
PhD student
PhD student
Postdoc
Postdoc
Postdoc
PhD student
Postdoc
Postdoc
Postdoc
PhD student
Postdoc
PhD student
Postdoc
PhD student
PI/Group Leader
Postdoc
PI/Group Leader
PI/Group Leader
PI/Group Leader
Postdoc
Postdoc
PhD student
PI/Group Leader
Postdoc
PI/Group Leader
Postdoc
PI/Group Leader
Postdoc
Postdoc
PI/Group Leader
PhD student
PI/Group Leader
PhD student
Postdoc
PhD student
PI/Group Leader
PhD student
PhD student
PhD student
PhD student
PI/Group Leader
Postdoc
Postdoc
PhD student
Postdoc
PI/Group Leader
Postdoc
Postdoc
PhD student
PI/Group Leader
PhD student
Postdoc
PI/Group Leader
PhD student
Postdoc
PhD student
Postdoc
Postdoc
Postdoc
Postdoc
PI/Group Leader
PhD student
PhD student
PI/Group Leader
Postdoc
Postdoc
PhD student
Postdoc
PI/Group Leader
Postdoc
Postdoc
PhD student
Postdoc
PI/Group Leader
PhD student
PhD student
PhD student
PhD student
PI/Group Leader
Postdoc
PI/Group Leader
Postdoc
PI/Group Leader
PhD student
PI/Group Leader
Postdoc
PI/Group Leader
PhD student
Postdoc
PhD student
PhD student
Postdoc
PhD student
PhD student
Postdoc
PhD student
Postdoc
PI/Group Leader
Postdoc
PhD student
PhD student
PhD student
Postdoc
PhD student
PI/Group Leader
PI/Group Leader
PhD student
PI/Group Leader
PhD student
PhD student
Postdoc
PI/Group Leader
PhD student
Postdoc
Postdoc
PI/Group Leader
PhD student
PhD student
Postdoc
PhD student
Postdoc
Postdoc
Postdoc
PhD student
PhD student
PI/Group Leader
PhD student
PhD student
Postdoc
PhD student
PI/Group Leader
Postdoc
PhD student
PI/Group Leader
PI/Group Leader
PI/Group Leader
Postdoc
PI/Group Leader
Postdoc
Postdoc
PI/Group Leader
PI/Group Leader
Postdoc
Postdoc
PhD student
Postdoc
PhD student
Postdoc
PhD student
Postdoc
PI/Group Leader
Postdoc
Postdoc
PI/Group Leader
Postdoc
PI/Group Leader
PhD student

## Sheet: R-Research Experience
Q5 - How many years have you been working in research?
3
9		1 bis 4	5 bis 8	9 bis 12	13-16	17-20	over 20	All
4		66	122	166	186	197	226
5		66	56	44	20	11	29	226
4		0.290749	0.246696	0.193833	0.0881057	0.0484581	0.127753	1
4		29.1	24.7	19.4	8.8	4.9	12.8	100.1
6.5		1 missing value	1
11			0.00440529
6			0.4
5		Max	37
5
20		AV	10.0513
8
2
4
7
9
7
5
4
15
2
3
10
10
7
5
3
9
10
3
5
11
1
3
6
3
7
2
7
1
1.5
8
3
11
14
11
5
24
4
4
3
5
12
4
5
5
4
2
7
5
7
5
8
2
13
9
5
5
10
10
8
15
6
10
16
10
3
12
7
9
4
11
13
3
15
22
9
17
4
13
14
17
6
14
35
8
10
4
30
5
10
4
25
2
6
3
2
20
7
10
5
9
10
6
7
2
21
8
10
35
3
5
0.6
15
12
12
20
20
4
1
22
5
5
7
8
17
4
12
2
15
30
5
3
5
2
20
25
11
12
22
3
17
4
22
3
9
5
2
9
1
3
4
2
8
33
12
2
2
2.5
5
2
20
25
9
30
7
1
10
34
4
10
7
30
2
3.5
18
4
13
6
14
10
12
26
2
1
10
2
15
8
4
25
37
28
10
14
15
14
23
30
10
31
7
16
3
23
4
25
27
8
15
24
12
11
25
7

## Sheet: R_Research field
Q6 - What is your area of research?
Systems Biology				n/a	24
Cardiovascular/Metabolic Research				Cancer Biology	5
Neuroscience				Cardiovascular/Metabolic Research	7
Systems Biology				Chemistry	10
Life Sciences				Clinical Research	4
Neuroscience				Genetics	4
Life Sciences				Immunology	19
Cardiovascular/Metabolic Research				Life Sciences	68
Cancer Biology				Microbiology	6
Neuroscience				Neuroscience	32
Life Sciences				Physics	17
Life Sciences				Social Sciences	19
Life Sciences				Systems Biology	12
Genetics					227
Clinical Research						Percentage
Life Sciences				Life Sciences	141	0.621145	62.1
Immunology				Chemistry	10	0.0440529	4.4
Life Sciences				Physics	17	0.0748899	7.5
Neuroscience				Social Sciences	19	0.0837004	8.4
Cardiovascular/Metabolic Research				Systems Biology	12	0.0528634	5.3
Neuroscience				Clinical Research	4	0.0176211	1.8
Clinical Research				n/a	24	0.105727	10.6
Immunology					227	1	100.1
Neuroscience
Neuroscience
Cancer Biology
Cancer Biology
Genetics
Life Sciences
Cardiovascular/Metabolic Research
Life Sciences
Neuroscience
Systems Biology
Neuroscience
-
-
Neuroscience
Life Sciences
Neuroscience
Clinical Research
Social Sciences
Systems Biology
Life Sciences
Neuroscience
Systems Biology
Neuroscience
Clinical Research
Life Sciences
Cardiovascular/Metabolic Research
Neuroscience
Immunology
Systems Biology
Cancer Biology
Life Sciences
Life Sciences
Cancer Biology
-
Neuroscience
Neuroscience
Systems Biology
Genetics
Life Sciences
Neuroscience
Neuroscience
Chemistry
-
Physics
-
Physics
-
Cardiovascular/Metabolic Research
Life Sciences
Neuroscience
Life Sciences
Neuroscience
Life Sciences
Life Sciences
Neuroscience
Immunology
Life Sciences
Neuroscience
Neuroscience
Neuroscience
Life Sciences
Life Sciences
Physics
-
-
Social Sciences
-
Physics
Social Sciences
Life Sciences
-
Social Sciences
Life Sciences
Social Sciences
Neuroscience
Social Sciences
Life Sciences
Social Sciences
Neuroscience
-
Physics
Physics
Cardiovascular/Metabolic Research
Life Sciences
Social Sciences
Neuroscience
Life Sciences
Life Sciences
Life Sciences
Life Sciences
Neuroscience
Chemistry
-
Systems Biology
Life Sciences
Life Sciences
Life Sciences
Social Sciences
Life Sciences
Microbiology
Chemistry
Life Sciences
Immunology
Life Sciences
Immunology
Social Sciences
Immunology
Immunology
Life Sciences
Immunology
Life Sciences
Life Sciences
Immunology
Life Sciences
Physics
Immunology
Life Sciences
Immunology
-
Microbiology
Genetics
Chemistry
Systems Biology
Immunology
Life Sciences
Physics
Life Sciences
-
Life Sciences
Social Sciences
Life Sciences
-
Life Sciences
Systems Biology
Life Sciences
Social Sciences
Life Sciences
Life Sciences
Systems Biology
Life Sciences
Immunology
Immunology
Life Sciences
Microbiology
Social Sciences
Chemistry
-
Social Sciences
Life Sciences
Microbiology
Chemistry
Life Sciences
Physics
Life Sciences
Immunology
Immunology
Life Sciences
-
Life Sciences
Life Sciences
Chemistry
-
Life Sciences
Social Sciences
Life Sciences
Life Sciences
Microbiology
Social Sciences
Social Sciences
Immunology
Social Sciences
-
Immunology
Life Sciences
Social Sciences
Systems Biology
Life Sciences
-
Neuroscience
Physics
Chemistry
Physics
Physics
-
Chemistry
Physics
Physics
Physics
Physics
Life Sciences
Life Sciences
Life Sciences
Neuroscience
Physics
Microbiology
Neuroscience
-
Chemistry
Life Sciences
Life Sciences
-
Neuroscience
Life Sciences
-
