# Supplementary material for: A survey of travel behaviour among scientists in Germany and the potential for change
Source: eLife. 2020 May 28;9:e56765. doi: 10.7554/eLife.56765 (PMC7255798; doi:10.7554/eLife.56765)
Supplement: Figure 2—source data 1. [file elife-56765-fig2-data1.xlsx]

## Sheet: R_Total meetings
Q7 - What is your academic position?	Q8 - How many scientific meetings/conferences have you visited this year (2019)?
PhD	0
PhD	0
PhD student	0		Average
PhD student	0		All	3.0837		All	PhD	Postdoc	PI/Group Leader
PhD student	2		PhD	2.219		0	0	1	1
PhD student	0		Postdoc	3.354		0	0	1	2
PhD student	2		PI	4.762		0	0	5	3
Postdoc	1					0	0	1	4
PhD student	4					2	2	2	4
Postdoc	1					0	0	3	3
Postdoc	5					2	2	4	3
PI/Group Leader	1					4	4	2	2
Postdoc	1					2	2	1	7
PhD student	2					3	3	5	8
PhD student	3					7	7	5	3
Postdoc	2					2	2	0	6
Postdoc	3					3	3	2	4
Postdoc	4					1	1	3	0
PhD student	7					2	2	0	1
Postdoc	2					5	5	3	3
Postdoc	1					0	0	0	8
PhD student	2					3	3	3	0
PhD student	3					2	2	1	3
PhD student	1					4	4	0	3
PhD student	2					2	2	1	12
PhD student	5					1	1	2	2
PhD student	0					3	3	2	12
PhD student	3					2	2	3	5
PhD student	2					2	2	1	1
PI/Group Leader	2					1	1	2	1
PhD student	4					2	2	6	9
Postdoc	5					2	2	2	13
PhD student	2					2	2	3	2
PhD student	1					2	2	1	8
PhD student	3					0	0	2	4
Postdoc	5					6	6	5	8
PhD student	2					3	3	7	14
Postdoc	0					1	1	0	5
PhD student	2					0	0	2	6
Postdoc	2					4	4	3	6
PhD student	1					0	0	2	2
PhD student	2					1	1	5	5
PhD student	2					5	5	7	3
PhD student	2					3	3	2	2
PhD student	2					0	0	2	10
PhD student	0					4	4	1	2
PhD student	6					1	1	0
PhD student	3					2	2	10
Postdoc	3					1	1	2
PhD student	1					1	1	4
PhD student	0					2	2	7
PhD student	4					5	5	1
PhD student	0					1	1	2
Postdoc	0					0	0	2
PhD student	1					5	5	15
PhD student	5					1	1	1
PhD student	3					3	3	3
PhD student	0					2	2	4
PhD student	4					0	0	0
PhD student	1					2	2	1
PhD student	2					2	2	5
PhD student	1					1	1	3
PhD student	1					1	1	3
PhD student	2					4	4	5
Postdoc	3					3	3	7
PhD student	5					4	4	3
Postdoc	0					1	1	20
PhD student	1					4	4	4
PhD student	0					3	3	8
PhD student	5					3	3	5
PhD student	1					0	0	2
Postdoc	3					1	1	9
Postdoc	1					3	3	6
Postdoc	0					3	3	3
PhD student	3					1	1	1
Postdoc	1					1	1	3
Postdoc	2					3	3	8
Postdoc	2					2	2	2
PhD student	2					3	3	5
Postdoc	3					1	1	2
PhD student	0					3	3	3
Postdoc	1					1	1	0
PhD student	2					4	4	3
PI/Group Leader	3					0	0
Postdoc	2					3	3
PI/Group Leader	4					3	3
PI/Group Leader	4					2	2
PI/Group Leader	3					4	4
Postdoc	6					3	3
Postdoc	2					1	1
PhD student	2					2	2
PI/Group Leader	3					1	1
Postdoc	3					1	1
PI/Group Leader	2					2	2
Postdoc	1					5	5
PI/Group Leader	7					4	4
Postdoc	2					2	2
Postdoc	5					4	4
PI/Group Leader	8					1	1
PhD student	1					2	2
PI/Group Leader	3					6	6
PhD student	1					2	2
Postdoc	7					5	5
PhD student	4					2	2
PI/Group Leader	6					3	3
PhD student	3					2	2
PhD student	4					1	1
PhD student	1					5	5
PhD student	4					1	1
PI/Group Leader	4
Postdoc	0
Postdoc	2
PhD student	3
Postdoc	3
PI/Group Leader	0
Postdoc	2
Postdoc	5
PhD student	3
PI/Group Leader	1
PhD student	0
Postdoc	7
PI/Group Leader	3
PhD student	1
Postdoc	2
PhD student	3
Postdoc	2
Postdoc	1
Postdoc	0
Postdoc	10
PI/Group Leader	8
PhD student	3
PhD student	1
PI/Group Leader	0
Postdoc	2
Postdoc	4
PhD student	1
Postdoc	7
PI/Group Leader	3
Postdoc	1
Postdoc	2
PhD student	3
Postdoc	2
PI/Group Leader	3
PhD student	2
PhD student	3
PhD student	1
PhD student	3
PI/Group Leader	12
Postdoc	15
PI/Group Leader	2
Postdoc	1
PI/Group Leader	12
PhD student	1
PI/Group Leader	5
Postdoc	3
PI/Group Leader	1
PhD student	4
Postdoc	4
PhD student	0
PhD student	3
Postdoc	0
PhD student	3
PhD student	2
Postdoc	1
PhD student	4
Postdoc	5
PI/Group Leader	1
Postdoc	3
PhD student	3
PhD student	1
PhD student	2
Postdoc	3
PhD student	1
PI/Group Leader	9
PI/Group Leader	13
PhD student	1
PI/Group Leader	2
PhD student	2
PhD student	5
Postdoc	5
PI/Group Leader	8
PhD student	4
Postdoc	7
Postdoc	3
PI/Group Leader	4
PhD student	2
PhD student	4
Postdoc	20
PhD student	1
Postdoc	4
Postdoc	8
Postdoc	5
PhD student	2
PhD student	6
PI/Group Leader	8
PhD student	2
PhD student	5
Postdoc	2
PhD student	2
PI/Group Leader	14
Postdoc	9
PhD student	3
PI/Group Leader	5
PI/Group Leader	6
PI/Group Leader	6
Postdoc	6
PI/Group Leader	2
Postdoc	3
Postdoc	1
PI/Group Leader	5
PI/Group Leader	3
Postdoc	3
Postdoc	8
PhD student	2
Postdoc	2
PhD student	1
Postdoc	5
PhD student	5
Postdoc	2
PI/Group Leader	2
Postdoc	3
Postdoc	0
PI/Group Leader	10
Postdoc	3
	2
PI/Group Leader	2
PhD student	1

## Sheet: R_National meetings
Q7 - What is your academic position?	Q9 - How many national scientific meetings/conferences have you visited this year (2019)?
PhD	1
PhD	2
PhD student	1			All	2.14537
PhD student	1			PhD	1.77
PhD student	1			Postdoc	2.3
PhD student	0			PI	2.81
PhD student	2
Postdoc	1
PhD student	2
Postdoc	1
Postdoc	2
PI/Group Leader	0
Postdoc	0
PhD student	1
PhD student	3
Postdoc	0
Postdoc	3
Postdoc	4
PhD student	4				PhD	Postdoc	PI
Postdoc	1
Postdoc	1
PhD student	2				1	1	0
PhD student	2				2	1	1
PhD student	0				1	2	2
PhD student	2				1	0	3
PhD student	4				1	0	1
PhD student	0				0	3	0
PhD student	2				2	4	0
PhD student	2				2	1	2
PI/Group Leader	1				1	1	7
PhD student	4				3	4	8
Postdoc	4				4	4	0
PhD student	12				2	0	4
PhD student	1				2	0	4
PhD student	3				0	1	0
Postdoc	4				2	0	1
PhD student	1				4	0	2
Postdoc	0				0	0	3
PhD student	2				2	0	0
Postdoc	0				2	0	1
PhD student	0				4	0	2
PhD student	0				12	1	4
PhD student	2				1	0	1
PhD student	1				3	1	10
PhD student	0				1	2	2
PhD student	0				2	0	1
PhD student	5				0	1	1
PhD student	2				0	5	5
Postdoc	1				2	2	7
PhD student	0				1	1	1
PhD student	0				0	0	4
PhD student	3				0	1	1
PhD student	0				5	2	4
Postdoc	0				2	2	6
PhD student	1				0	0	3
PhD student	4				0	4	3
PhD student	1				3	2	5
PhD student	0				0	1	2
PhD student	2				1	2	3
PhD student	1				4	2	2
PhD student	0				1	1	2
PhD student	0				0	1	8
PhD student	1				2	2	2
PhD student	2				1	0
Postdoc	0				0	9
PhD student	2				0	1
Postdoc	0				1	8
PhD student	0				2	6
PhD student	0				2	0
PhD student	3				0	1
PhD student	1				0	2
Postdoc	0				3	15
Postdoc	0				1	1
Postdoc	0				3	1
PhD student	3				1	2
Postdoc	1				3	0
Postdoc	0				1	0
Postdoc	1				2	1
PhD student	1				1	3
Postdoc	2				1	2
PhD student	3				3	4
Postdoc	0				2	7
PhD student	1				2	0
PI/Group Leader	2				0	20
Postdoc	1				2	0
PI/Group Leader	3				2	4
PI/Group Leader	1				3	1
PI/Group Leader	0				2	1
Postdoc	5				1	9
Postdoc	2				1	6
PhD student	2				0	3
PI/Group Leader	0				1	0
Postdoc	1				1	2
PI/Group Leader	2				3	10
Postdoc	0				1	3
PI/Group Leader	7				3	1
Postdoc	1				4	2
Postdoc	2				2	0
PI/Group Leader	8				0	1
PhD student	1				4	1
PI/Group Leader	0				1
PhD student	1				2
Postdoc	2				3
PhD student	3				0
PI/Group Leader	4				4
PhD student	2				2
PhD student	2				1
PhD student	0				1
PhD student	2				1
PI/Group Leader	4				1
Postdoc	0				2
Postdoc	4				4
PhD student	2				2
Postdoc	2				2
PI/Group Leader	0				1
Postdoc	1				4
Postdoc	2				1
PhD student	3				6
PI/Group Leader	1				2
PhD student	2				5
Postdoc	2				1
PI/Group Leader	2				1
PhD student	1				0
Postdoc	1				1
PhD student	1				3
Postdoc	1				0
Postdoc	2
Postdoc	0
Postdoc	9
PI/Group Leader	3
PhD student	0
PhD student	1
PI/Group Leader	0
Postdoc	1
Postdoc	8
PhD student	1
Postdoc	6
PI/Group Leader	1
Postdoc	0
Postdoc	1
PhD student	3
Postdoc	2
PI/Group Leader	2
PhD student	1
PhD student	3
PhD student	4
PhD student	2
PI/Group Leader	4
Postdoc	15
PI/Group Leader	1
Postdoc	1
PI/Group Leader	10
PhD student	0
PI/Group Leader	2
Postdoc	1
PI/Group Leader	1
PhD student	4
Postdoc	2
PhD student	1
PhD student	2
Postdoc	0
PhD student	3
PhD student	0
Postdoc	0
PhD student	4
Postdoc	1
PI/Group Leader	1
Postdoc	3
PhD student	2
PhD student	1
PhD student	1
Postdoc	2
PhD student	1
PI/Group Leader	5
PI/Group Leader	7
PhD student	1
PI/Group Leader	1
PhD student	2
PhD student	4
Postdoc	4
PI/Group Leader	4
PhD student	2
Postdoc	7
Postdoc	0
PI/Group Leader	1
PhD student	2
PhD student	1
Postdoc	20
PhD student	4
Postdoc	0
Postdoc	4
Postdoc	1
PhD student	1
PhD student	6
PI/Group Leader	4
PhD student	2
PhD student	5
Postdoc	1
PhD student	1
PI/Group Leader	6
Postdoc	9
PhD student	1
PI/Group Leader	3
PI/Group Leader	3
PI/Group Leader	5
Postdoc	6
PI/Group Leader	2
Postdoc	3
Postdoc	0
PI/Group Leader	3
PI/Group Leader	2
Postdoc	2
Postdoc	10
PhD student	0
Postdoc	3
PhD student	1
Postdoc	1
PhD student	3
Postdoc	2
PI/Group Leader	2
Postdoc	0
Postdoc	1
PI/Group Leader	8
Postdoc	1
	1
PI/Group Leader	2
PhD student	0

## Sheet: R_International meetings
Q7 - What is your academic position?	Q12 - How many international scientific meetings/conferences did you visit this year (2019)?
PhD	0
PhD	0
PhD student	0		All	1.36564
PhD student	0		PhD	0.866
PhD student	2		Postdoc	1.5316
PhD student	0		PI	2.3095
PhD student	1
Postdoc	1
PhD student	2
Postdoc	1
Postdoc	3		PhD	Postdoc	PI
PI/Group Leader	1		0	1	1
Postdoc	1		0	1	1
PhD student	1		0	3	1
PhD student	0		0	1	1
Postdoc	2		2	2	3
Postdoc	0		0	0	3
Postdoc	0		1	0	1
PhD student	2		2	2	1
Postdoc	2		1	1	0
Postdoc	1		0	1	0
PhD student	0		2	1	0
PhD student	3		0	0	2
PhD student	0		3	2	1
PhD student	2		0	1	0
PhD student	1		2	0	1
PhD student	0		1	3	1
PhD student	1		0	0	5
PhD student	0		1	3	0
PI/Group Leader	1		0	1	2
PhD student	1		1	0	1
Postdoc	1		1	0	10
PhD student	1		0	2	1
PhD student	0		0	1	3
PhD student	0		1	2	4
Postdoc	1		0	1	0
PhD student	1		1	1	0
Postdoc	0		2	1	4
PhD student	0		0	2	6
Postdoc	2		2	2	1
PhD student	1		2	1	4
PhD student	2		0	1	3
PhD student	0		6	5	4
PhD student	2		3	4	7
PhD student	2		0	0	2
PhD student	0		0	1	6
PhD student	6		1	1	1
PhD student	3		0	1	1
Postdoc	1		1	3	2
PhD student	0		0	5	3
PhD student	0		2	1	2
PhD student	1		0	2	6
PhD student	0		2	1	2
Postdoc	0		0	0
PhD student	1		0	1
PhD student	0		1	1
PhD student	2		1	4
PhD student	0		0	1
PhD student	2		3	1
PhD student	0		1	1
PhD student	0		0	1
PhD student	1		2	1
PhD student	1		1	0
PhD student	0		0	2
Postdoc	3		1	2
PhD student	3		1	0
Postdoc	0		2	1
PhD student	1		0	4
PhD student	0		0	0
PhD student	2		0	1
PhD student	1		1	1
Postdoc	3		1	1
Postdoc	1		2	0
Postdoc	0		1	5
PhD student	0		2	4
Postdoc	0		1	4
Postdoc	2		1	4
Postdoc	1		0	0
PhD student	1		1	2
Postdoc	2		2	1
PhD student	1		0	2
Postdoc	1		0	1
PhD student	2		1	1
PI/Group Leader	1		0	2
Postdoc	1		0	2
PI/Group Leader	1		0	4
PI/Group Leader	3		1	0
PI/Group Leader	3		1	3
Postdoc	1		0	0
Postdoc	2		0	2
PhD student	0		0
PI/Group Leader	1		1
Postdoc	2		1
PI/Group Leader	1		0
Postdoc	1		0
PI/Group Leader	0		1
Postdoc	1		0
Postdoc	5		1
PI/Group Leader	0		1
PhD student	0		1
PI/Group Leader	0		0
PhD student	0		1
Postdoc	4		2
PhD student	1		0
PI/Group Leader	2		3
PhD student	1		0
PhD student	2		1
PhD student	1		1
PhD student	2		0
PI/Group Leader	1		0
Postdoc	0		1
Postdoc	1		2
PhD student	1		2
Postdoc	1		1
PI/Group Leader	0		2
Postdoc	1		1
Postdoc	3
PhD student	1
PI/Group Leader	1
PhD student	0
Postdoc	5
PI/Group Leader	1
PhD student	1
Postdoc	1
PhD student	2
Postdoc	2
Postdoc	1
Postdoc	0
Postdoc	1
PI/Group Leader	5
PhD student	0
PhD student	0
PI/Group Leader	0
Postdoc	1
Postdoc	4
PhD student	1
Postdoc	1
PI/Group Leader	2
Postdoc	1
Postdoc	1
PhD student	0
Postdoc	1
PI/Group Leader	1
PhD student	0
PhD student	0
PhD student	1
PhD student	1
PI/Group Leader	10
Postdoc	1
PI/Group Leader	1
Postdoc	0
PI/Group Leader	3
PhD student	0
PI/Group Leader	4
Postdoc	2
PI/Group Leader	0
PhD student	0
Postdoc	2
PhD student	0
PhD student	1
Postdoc	0
PhD student	1
PhD student	0
Postdoc	1
PhD student	0
Postdoc	4
PI/Group Leader	0
Postdoc	0
PhD student	1
PhD student	0
PhD student	1
Postdoc	1
PhD student	1
PI/Group Leader	4
PI/Group Leader	6
PhD student	1
PI/Group Leader	1
PhD student	0
PhD student	1
Postdoc	1
PI/Group Leader	4
PhD student	2
Postdoc	1
Postdoc	0
PI/Group Leader	3
PhD student	0
PhD student	3
Postdoc	5
PhD student	0
Postdoc	4
Postdoc	4
Postdoc	4
PhD student	1
PhD student	1
PI/Group Leader	4
PhD student	0
PhD student	0
Postdoc	0
PhD student	1
PI/Group Leader	7
Postdoc	2
PhD student	2
PI/Group Leader	2
PI/Group Leader	6
PI/Group Leader	1
Postdoc	1
PI/Group Leader	1
Postdoc	2
Postdoc	1
PI/Group Leader	2
PI/Group Leader	3
Postdoc	1
Postdoc	2
PhD student	2
Postdoc	2
PhD student	1
Postdoc	4
PhD student	2
Postdoc	0
PI/Group Leader	2
Postdoc	3
Postdoc	0
PI/Group Leader	6
Postdoc	2
	1
PI/Group Leader	2
PhD student	1

## Sheet: R_Mode National
Q10 - Which mode of transport did you use for attending national scientific meetings/conferences in 2019? (Plane)	Q10 - Which mode of transport did you use for attending national scientific meetings/conferences in 2019? (Train)	Q10 - Which mode of transport did you use for attending national scientific meetings/conferences in 2019? (Car (your own))	Q10 - Which mode of transport did you use for attending national scientific meetings/conferences in 2019? (Car (rented or shared))	Q10 - Which mode of transport did you use for attending national scientific meetings/conferences in 2019? (Bus)	Q10 - Which mode of transport did you use for attending national scientific meetings/conferences in 2019? (Bike)						Q11 - Could you have used a more environmentally friendly mode of transportation for getting to national scientific meetings/conferences?
-	TRUE	-	-	-	-						no					Percentage
-	-	-	-	TRUE	-						no			yes, true for all of them	17	0.0748899	7.5
-	TRUE	-	-	-	-						yes, true for some of them			yes, true for some of them	36	0.15859	15.9
-	-	-	-	-	TRUE						no			no	165	0.726872	72.7
TRUE	TRUE	-	-	-	-						no			n/a	9	0.0396476	3.9
-	-	-	-	-	-						-				227	1	100
TRUE	TRUE	-	-	-	-						yes, true for some of them
-	-	-	-	TRUE	-						no
-	TRUE	-	-	-	-						yes, true for all of them
-	TRUE	-	-	-	-						no
-	TRUE	-	-	-	-						no
-	-	-	-	-	-						yes, true for some of them
TRUE	-	-	-	-	-						no
-	TRUE	-	-	-	TRUE						no
-	TRUE	-	-	-	-						no
-	-	-	-	-	-			Percentage			-
TRUE	TRUE	-	-	-	-	Plane	40	0.12987	13		yes, true for some of them
-	TRUE	-	-	-	-	Train	170	0.551948	55.2		no
-	TRUE	-	-	-	-	(Car own)	9	0.0292208	2.9		no
-	TRUE	-	-	-	-	Car (rented or shared)	15	0.0487013	4.9		yes, true for some of them
-	-	TRUE	-	-	-	Bus	36	0.116883	11.7		yes, true for all of them
-	TRUE	-	-	TRUE	-	Bike	38	0.123377	12.3		no
TRUE	TRUE	-	-	TRUE	-		308	1	100		yes, true for all of them
-	TRUE	-	TRUE	-	-						no
TRUE	TRUE	-	-	-	-						no
-	TRUE	-	-	-	-						no
-	-	-	-	-	-						yes, true for some of them
-	TRUE	-	-	-	TRUE						no
-	TRUE	-	-	TRUE	-						no
TRUE	-	-	-	-	-						yes, true for all of them
TRUE	TRUE	-	-	TRUE	-						yes, true for some of them
-	TRUE	-	-	-	-						no
TRUE	TRUE	-	-	TRUE	-						no
-	-	-	-	-	TRUE						no
-	TRUE	-	-	-	-						no
-	TRUE	-	-	-	TRUE						no
-	-	-	-	-	TRUE						no
-	-	-	-	-	-						-
-	TRUE	-	-	TRUE	-						no
TRUE	TRUE	-	-	-	-						yes, true for some of them
-	TRUE	-	-	TRUE	-						no
TRUE	-	-	-	-	-						yes, true for all of them
-	TRUE	-	-	TRUE	-						no
-	-	-	-	-	TRUE						no
-	TRUE	-	-	-	-						no
-	TRUE	-	-	TRUE	-						yes, true for all of them
TRUE	TRUE	-	-	TRUE	-						no
TRUE	TRUE	-	-	-	-						yes, true for some of them
-	-	-	-	-	TRUE						no
-	TRUE	-	-	-	-						yes, true for all of them
TRUE	-	-	-	-	-						yes, true for some of them
TRUE	TRUE	-	-	-	TRUE						yes, true for some of them
-	-	-	-	-	-						-
-	-	-	-	-	-						-
-	-	-	-	TRUE	-						no
-	TRUE	-	-	-	-						no
-	TRUE	-	-	-	-						yes, true for some of them
-	-	-	-	-	-						yes, true for some of them
-	TRUE	-	-	-	-						no
-	TRUE	-	-	TRUE	-						no
-	TRUE	-	-	-	-						no
-	-	-	-	-	-						-
TRUE	TRUE	-	-	-	-						yes, true for all of them
-	TRUE	-	-	-	-						no
-	-	-	-	-	-						no
-	TRUE	-	-	-	-						no
-	-	-	-	-	TRUE						no
-	-	-	-	-	-						no
-	-	-	-	-	-						-
-	TRUE	-	TRUE	TRUE	-						no
-	TRUE	-	-	-	-						no
TRUE	TRUE	-	-	-	-						no
TRUE	-	-	-	-	-						yes, true for some of them
-	-	-	-	-	-						no
-	TRUE	-	TRUE	TRUE	-						no
-	TRUE	-	-	-	-						no
-	-	-	-	-	-						-
-	TRUE	-	-	TRUE	-						no
-	TRUE	-	-	-	-						no
TRUE	TRUE	-	TRUE	-	-						no
-	TRUE	-	-	-	-						no
TRUE	TRUE	-	-	-	-						yes, true for some of them
-	-	-	-	-	TRUE						no
TRUE	TRUE	-	-	-	-						yes, true for some of them
-	TRUE	-	-	-	-						no
-	TRUE	-	-	-	-						no
-	TRUE	-	-	TRUE	TRUE						no
TRUE	TRUE	-	-	-	-						yes, true for some of them
-	TRUE	-	-	-	-						no
-	TRUE	-	-	-	-						no
-	-	-	TRUE	TRUE	TRUE						yes, true for some of them
-	TRUE	-	-	-	-						no
-	-	TRUE	-	-	-						yes, true for some of them
-	TRUE	-	-	-	-						no
-	-	-	TRUE	-	-						yes, true for some of them
-	TRUE	-	-	-	-						no
-	TRUE	-	-	-	-						no
-	TRUE	TRUE	-	-	-						yes, true for some of them
-	TRUE	-	-	TRUE	TRUE						yes, true for all of them
-	-	-	-	-	TRUE						no
-	TRUE	-	-	-	-						no
-	-	-	-	TRUE	TRUE						no
-	TRUE	TRUE	-	-	-						no
-	TRUE	-	-	-	-						no
-	TRUE	-	-	-	-						no
-	TRUE	-	-	-	-						no
-	TRUE	TRUE	-	-	-						yes, true for some of them
-	TRUE	-	-	-	-						no
TRUE	TRUE	-	-	TRUE	-						no
-	TRUE	TRUE	-	-	-						no
-	-	-	-	-	-						-
-	TRUE	-	-	-	TRUE						no
-	TRUE	-	-	-	-						no
-	TRUE	-	-	TRUE	-						yes, true for some of them
-	TRUE	-	-	-	-						no
-	TRUE	-	-	-	-						no
-	TRUE	-	-	-	-						no
-	TRUE	-	TRUE	-	-						yes, true for some of them
-	-	-	-	-	TRUE						no
-	-	-	-	TRUE	-						no
-	TRUE	-	-	-	-						no
-	TRUE	-	-	-	-						no
-	TRUE	-	-	-	-						no
-	TRUE	-	-	-	-						no
-	TRUE	-	-	-	-						no
-	-	-	-	-	TRUE						no
TRUE	TRUE	-	-	-	-						no
TRUE	-	-	-	-	-						yes, true for all of them
-	TRUE	-	-	TRUE	TRUE						no
-	TRUE	-	-	-	-						no
-	TRUE	-	-	-	-						no
-	TRUE	-	-	-	-						no
TRUE	-	-	-	-	-						no
-	TRUE	-	-	-	-						no
TRUE	TRUE	-	-	-	-						yes, true for some of them
TRUE	-	-	-	TRUE	-						yes, true for some of them
TRUE	-	-	-	-	TRUE						no
-	TRUE	-	-	-	-						no
TRUE	-	-	-	-	-						yes, true for all of them
-	TRUE	-	-	-	-						no
-	TRUE	-	-	-	-						no
-	TRUE	-	-	-	-						no
-	TRUE	-	-	-	-						no
-	TRUE	-	-	-	-						no
-	TRUE	-	-	-	TRUE						no
-	TRUE	-	-	-	TRUE						no
-	TRUE	-	-	TRUE	-						no
TRUE	TRUE	-	-	-	-						yes, true for some of them
-	TRUE	-	-	-	-						yes, true for all of them
-	TRUE	-	-	-	-						no
-	TRUE	-	-	-	TRUE						no
-	TRUE	-	-	TRUE	TRUE						no
-	TRUE	-	-	-	-						no
-	TRUE	-	-	-	-						no
-	TRUE	-	-	-	-						no
-	TRUE	-	TRUE	-	-						no
-	TRUE	-	-	-	-						no
-	TRUE	-	-	-	-						no
-	-	-	-	-	TRUE						no
-	TRUE	-	-	-	-						no
-	-	-	-	-	-						no
-	TRUE	-	-	-	-						no
-	TRUE	-	-	TRUE	-						no
-	TRUE	-	-	-	-						yes, true for all of them
-	TRUE	-	-	TRUE	-						no
-	TRUE	-	-	-	-						no
-	TRUE	-	-	-	-						no
-	TRUE	-	-	-	-						no
-	TRUE	-	-	-	-						no
-	TRUE	-	-	-	-						no
-	-	-	-	-	TRUE						no
-	TRUE	-	-	-	-						no
-	TRUE	-	-	-	-						no
-	TRUE	-	-	TRUE	TRUE						no
-	TRUE	-	TRUE	-	-						yes, true for some of them
-	TRUE	-	-	-	-						no
-	TRUE	-	-	-	-						no
-	TRUE	-	-	-	-						no
-	-	-	TRUE	TRUE	-						no
-	TRUE	-	TRUE	-	-						yes, true for some of them
-	TRUE	-	-	-	-						no
-	-	-	-	-	TRUE						no
TRUE	TRUE	-	-	-	TRUE						yes, true for some of them
-	TRUE	-	-	-	TRUE						no
-	TRUE	-	-	-	-						no
-	TRUE	-	-	-	-						no
TRUE	TRUE	-	-	-	-						yes, true for some of them
-	TRUE	-	-	TRUE	TRUE						no
-	TRUE	-	-	-	TRUE						no
TRUE	TRUE	-	-	-	-						yes, true for some of them
-	TRUE	-	-	-	TRUE						no
-	TRUE	-	-	-	-						no
TRUE	TRUE	-	-	-	-						yes, true for all of them
TRUE	TRUE	TRUE	-	-	-						no
-	TRUE	-	-	-	-						no
-	TRUE	-	-	-	-						no
-	TRUE	-	-	-	-						no
TRUE	-	-	-	-	-						yes, true for all of them
-	TRUE	-	TRUE	-	-						yes, true for some of them
TRUE	-	TRUE	-	-	-						yes, true for some of them
-	TRUE	-	-	-	-						no
-	-	-	-	TRUE	-						no
-	TRUE	-	-	-	-						no
-	TRUE	-	-	-	-						no
-	TRUE	-	-	-	TRUE						no
-	TRUE	-	-	-	-						no
TRUE	-	TRUE	-	-	-						yes, true for some of them
-	TRUE	-	-	-	-						no
-	TRUE	-	-	-	-						no
-	TRUE	-	-	-	-						no
-	TRUE	-	-	-	-						no
-	TRUE	-	-	-	-						no
-	TRUE	-	TRUE	-	-						yes, true for some of them
-	TRUE	-	-	-	-						no
-	TRUE	-	-	-	-						no
-	-	-	TRUE	-	-						no
-	TRUE	-	TRUE	-	-						no
-	TRUE	-	-	-	-						yes, true for all of them
-	TRUE	-	-	-	-						no
-	TRUE	-	-	-	-						no
TRUE	TRUE	-	-	-	-						yes, true for all of them
-	-	-	-	-	TRUE						no
-	TRUE	-	-	TRUE	TRUE						no
-	-	-	-	TRUE	-						no
-	TRUE	-	-	TRUE	-						no
-	TRUE	-	-	-	TRUE						no
-	-	-	-	-	-						no

## Sheet: R_Mode International 
Q12 - How many international scientific meetings/conferences did you visit this year (2019)?	Q13 - Which mode of transport did you use for attending international scientific meetings/conferences in 2019? (Plane)	Q13 - Which mode of transport did you use for attending international scientific meetings/conferences in 2019? (Train)	Q13 - Which mode of transport did you use for attending international scientific meetings/conferences in 2019? (Car (your own))	Q13 - Which mode of transport did you use for attending international scientific meetings/conferences in 2019? (Car (rented or shared))	Q13 - Which mode of transport did you use for attending international scientific meetings/conferences in 2019? (Bus)					Q14 - Could you have used a more environmentally friendly mode of transportation for getting to international scientific meetings/conferences?
-	-	-	-	-	-					-
-	-	-	-	-	-					no
-	-	-	-	-	-					-
-	-	-	-	-	-					-			yes, true for all of them	22	0.0969163	9.7
2	TRUE	-	-	-	-					yes, true for some of them			yes, true for some of them	35	0.154185	15.4
-	-	-	-	-	-	Plane	123	0.537118	53.7	-			no	122	0.537445	53.7
1	TRUE	-	-	-	-	Train	85	0.371179	37.1	no			n/a	45	0.198238	19.8
1	TRUE	-	-	-	-	Car own	4	0.0174672	1.7	yes, true for some of them			prefer not to say	3	0.0132159	1.3
2	TRUE	-	-	-	-	car shared	5	0.0218341	2.2	yes, true for all of them					1	99.9
1	TRUE	-	-	-	-	Bus	12	0.0524017	5.2	no
3	TRUE	-	-	TRUE	-		229	1	99.9	yes, true for some of them
1	TRUE	-	-	-	-					no
1	TRUE	-	-	-	-					no
1	TRUE	-	-	-	-					yes, true for all of them
-	-	-	-	-	-					-
2	TRUE	-	-	-	-					yes, true for some of them
-	-	-	-	-	-					-
-	-	-	-	-	-					-
2	TRUE	-	-	-	-					no
2	TRUE	TRUE	-	-	TRUE					yes, true for some of them
1	TRUE	-	-	-	-					yes, true for all of them
-	-	-	-	-	-					-
3	TRUE	TRUE	-	-	TRUE					yes, true for all of them
-	-	-	-	-	-					no
2	TRUE	TRUE	-	-	-					no
1	TRUE	-	-	-	-					no
-	-	-	-	-	-					yes, true for some of them
1	TRUE	-	-	-	-					no
-	-	-	-	-	-					-
1	TRUE	-	-	-	-					yes, true for some of them
1	-	TRUE	-	-	TRUE					no
1	-	TRUE	-	-	-					no
1	TRUE	TRUE	-	-	TRUE					no
-	-	-	-	-	-					-
-	-	TRUE	-	-	-					prefer not to say
1	TRUE	TRUE	-	-	-					yes, true for some of them
1	-	TRUE	-	-	-					no
-	-	-	-	-	-					-
-	-	-	-	-	-					-
2	TRUE	TRUE	-	-	-					yes, true for some of them
1	-	TRUE	-	-	TRUE					no
2	TRUE	-	-	-	-					no
-	-	-	-	-	-					-
2	TRUE	-	-	-	-					no
2	-	TRUE	-	-	-					no
-	TRUE	-	-	-	-					yes, true for all of them
6	TRUE	TRUE	-	-	TRUE					no
3	TRUE	-	-	-	-					yes, true for some of them
1	TRUE	-	-	-	-					no
-	-	-	-	-	-					-
-	-	-	-	-	-					no
1	TRUE	-	-	-	-					no
-	-	-	-	-	-					-
-	-	-	-	-	-					-
1	TRUE	TRUE	-	-	-					no
-	-	-	-	-	-					-
2	-	TRUE	-	-	-					yes, true for some of them
-	-	-	-	-	-					yes, true for some of them
2	TRUE	TRUE	-	-	-					yes, true for some of them
-	-	-	-	-	-					no
-	-	-	-	-	-					-
1	TRUE	-	-	-	-					yes, true for all of them
1	TRUE	TRUE	-	-	-					yes, true for all of them
-	-	-	-	-	-					-
3	TRUE	-	-	-	-					no
3	TRUE	-	-	-	-					yes, true for some of them
-	-	-	-	-	-					no
1	TRUE	-	-	-	-					no
-	-	-	-	-	-					-
2	TRUE	-	-	-	-					yes, true for some of them
1	TRUE	-	-	-	-					no
3	TRUE	TRUE	-	-	-					no
1	TRUE	-	-	-	-					yes, true for some of them
-	-	-	-	-	-					no
-	-	-	-	-	-					-
-	-	-	-	-	-					-
2	TRUE	-	-	-	-					no
1	TRUE	-	-	-	-					no
1	TRUE	-	-	-	-					yes, true for all of them
2	TRUE	TRUE	-	TRUE	-					no
1	-	TRUE	-	-	-					no
1	TRUE	TRUE	-	-	-					yes, true for some of them
2	TRUE	-	-	-	-					yes, true for some of them
1	TRUE	-	-	-	-					no
1	TRUE	-	-	-	-					no
1	TRUE	-	-	-	-					yes, true for all of them
3	TRUE	TRUE	-	-	-					no
3	TRUE	TRUE	-	-	-					yes, true for some of them
1	TRUE	-	-	-	-					no
2	-	TRUE	-	-	-					no
-	-	-	-	-	-					-
1	TRUE	-	-	-	-					yes, true for all of them
2	TRUE	TRUE	-	-	-					no
1	-	TRUE	-	-	-					no
1	-	-	-	TRUE	-					yes, true for some of them
-	-	-	-	-	-					-
1	-	TRUE	-	-	-					no
5	TRUE	-	TRUE	-	-					no
-	-	-	-	-	-					-
-	-	-	-	-	-					-
-	-	-	-	-	-					-
-	-	-	-	-	-					-
4	TRUE	TRUE	-	-	-					no
1	-	TRUE	-	-	-					no
2	TRUE	-	-	-	-					no
1	-	TRUE	-	-	-					no
2	-	TRUE	-	-	-					no
1	-	TRUE	-	-	-					no
2	TRUE	TRUE	-	-	-					no
1	-	TRUE	TRUE	-	TRUE					no
-	-	-	-	-	-					-
1	-	TRUE	-	-	-					no
1	-	TRUE	-	-	-					no
1	TRUE	-	-	-	-					yes, true for some of them
-	-	TRUE	-	-	-					no
1	-	TRUE	-	-	-					no
3	-	TRUE	-	-	-					no
1	-	-	-	TRUE	-					yes, true for all of them
1	TRUE	-	-	-	-					no
-	TRUE	-	-	-	-					no
5	TRUE	TRUE	-	-	-					no
1	TRUE	-	-	-	-					no
1	TRUE	-	-	-	-					yes, true for some of them
1	TRUE	-	-	-	-					no
2	TRUE	TRUE	-	-	-					yes, true for some of them
2	TRUE	-	-	-	-					no
1	TRUE	-	-	-	-					no
-	TRUE	-	-	-	-					prefer not to say
1	-	TRUE	-	-	-					no
5	TRUE	TRUE	-	-	-					yes, true for some of them
-	-	-	-	-	-					no
-	-	-	-	-	-					-
-	TRUE	-	-	-	-					no
1	-	TRUE	-	-	-					no
4	TRUE	TRUE	-	-	-					no
1	TRUE	-	-	-	-					no
1	TRUE	-	-	-	-					no
2	TRUE	-	-	-	-					yes, true for some of them
1	TRUE	-	-	-	-					yes, true for all of them
1	TRUE	TRUE	-	-	-					no
-	-	-	-	-	-					-
1	TRUE	-	-	-	-					yes, true for all of them
1	TRUE	-	-	-	-					yes, true for all of them
-	-	-	-	-	-					prefer not to say
-	-	-	-	-	-					-
1	-	TRUE	-	-	-					no
1	TRUE	-	-	-	-					no
10	TRUE	-	-	-	-					no
1	TRUE	-	-	-	-					yes, true for all of them
1	-	TRUE	-	TRUE	-					yes, true for some of them
-	-	-	-	-	-					-
3	TRUE	TRUE	-	-	-					no
-	-	TRUE	-	-	-					no
4	TRUE	TRUE	-	-	-					no
2	TRUE	-	-	-	-					no
-	-	-	-	-	-					-
-	-	-	-	-	-					-
2	TRUE	-	-	-	-					no
-	-	-	-	-	-					-
1	-	TRUE	-	-	-					no
-	-	-	-	-	-					no
1	TRUE	-	-	-	-					no
-	-	-	-	-	-					-
1	TRUE	TRUE	-	-	-					yes, true for some of them
-	-	-	-	-	-					no
4	TRUE	TRUE	-	-	-					no
-	-	-	-	-	-					-
-	-	-	-	-	-					-
1	TRUE	-	-	-	-					yes, true for all of them
-	-	TRUE	-	-	-					no
1	TRUE	TRUE	-	-	-					yes, true for some of them
1	TRUE	-	-	-	-					yes, true for all of them
1	TRUE	-	-	-	-					no
4	-	TRUE	-	-	TRUE					no
6	TRUE	-	-	-	-					no
1	-	TRUE	-	-	-					no
1	TRUE	-	-	-	-					no
-	-	-	-	-	-					-
1	TRUE	-	-	-	-					yes, true for all of them
1	-	TRUE	-	-	-					no
4	TRUE	TRUE	-	-	-					no
2	TRUE	-	-	-	-					no
1	TRUE	-	-	-	-					yes, true for some of them
-	-	TRUE	-	-	-					no
3	TRUE	TRUE	TRUE	-	-					yes, true for some of them
-	-	-	-	-	-					-
3	TRUE	TRUE	-	-	-					no
5	TRUE	TRUE	-	-	TRUE					no
-	-	-	-	-	-					-
4	TRUE	TRUE	-	-	TRUE					yes, true for some of them
4	TRUE	TRUE	-	-	-					yes, true for some of them
4	TRUE	-	-	-	-					no
1	-	TRUE	-	-	-					no
1	TRUE	-	-	-	-					no
4	TRUE	TRUE	-	-	-					no
-	-	-	-	-	-					-
-	-	-	-	-	-					-
-	TRUE	-	-	-	-					yes, true for all of them
1	-	TRUE	-	-	-					no
7	TRUE	-	-	-	-					no
2	-	TRUE	-	-	-					no
2	TRUE	-	-	-	-					yes, true for some of them
2	TRUE	-	-	-	-					yes, true for some of them
6	-	TRUE	-	-	-					no
1	TRUE	-	-	-	-					no
1	-	TRUE	-	-	-					no
1	-	-	TRUE	-	-					yes, true for all of them
2	TRUE	-	-	-	-					no
1	-	TRUE	-	-	-					no
2	TRUE	-	-	-	-					no
3	TRUE	TRUE	-	-	-					no
1	-	TRUE	-	-	-					no
2	-	TRUE	-	-	-					no
2	TRUE	-	-	-	-					no
2	-	TRUE	-	-	-					no
1	TRUE	TRUE	-	-	-					no
4	TRUE	TRUE	-	-	-					yes, true for some of them
2	-	TRUE	-	-	-					yes, true for all of them
-	-	-	-	-	-					-
2	-	TRUE	-	-	-					no
3	TRUE	TRUE	-	-	-					yes, true for all of them
-	-	TRUE	-	-	-					no
6	TRUE	TRUE	-	-	TRUE					no
2	TRUE	TRUE	-	-	TRUE					no
1	TRUE	-	-	-	-					no
2	TRUE	-	-	-	-					no
1	TRUE	-	-	-	-					no
