# Supplementary material for: A survey of travel behaviour among scientists in Germany and the potential for change
Source: eLife. 2020 May 28;9:e56765. doi: 10.7554/eLife.56765 (PMC7255798; doi:10.7554/eLife.56765)
Supplement: Figure 3—source data 1. [file elife-56765-fig3-data1.xlsx]

## Sheet: R_Motivation
Q15 - Are you aware of any initiative of your or any other research institution to promote environmentally friendly business trips?					Q16 - What is/was your motivation to choose your mode of transport? (Money)	Q16 - What is/was your motivation to choose your mode of transport? (Time)	Q16 - What is/was your motivation to choose your mode of transport? (Comfort)	Q16 - What is/was your motivation to choose your mode of transport? (Environment)	Q16 - What is/was your motivation to choose your mode of transport? (Other)
-	Initiatives				-	-	-	TRUE	-		Motivation
-	no	122	0.537445	53.7	-	TRUE	TRUE	TRUE	-
-	yes	73	0.321586	32.2	-	TRUE	TRUE	-	-
-	n/A	32	0.140969	14.1	-	-	TRUE	-	-		Money	84	0.175365	17.5
-		227		100	-	TRUE	-	-	-		Time	159	0.331942	33.2
-					-	-	-	-	-		Comfort	96	0.200418	20
no					-	TRUE	-	-	-		Environment	122	0.254697	25.5
no					TRUE	TRUE	-	-	-		Other	18	0.0375783	3.8
No					TRUE	TRUE	TRUE	TRUE	-			479	1	100
no					-	-	TRUE	TRUE	-
-					TRUE	TRUE	-	-	-
-					-	TRUE	-	-	-
No					-	TRUE	-	-	-
No					-	TRUE	-	TRUE	-
-					-	-	-	TRUE	-
no					-	TRUE	-	-	-
yes					TRUE	TRUE	TRUE	-	Very early meeting
No					TRUE	TRUE	TRUE	TRUE	-
yes					-	TRUE	-	-	-
No					TRUE	TRUE	-	TRUE	-
no					TRUE	TRUE	-	-	-
No					TRUE	TRUE	-	TRUE	-
no					TRUE	TRUE	-	-	-
no					-	TRUE	TRUE	TRUE	-
No					TRUE	TRUE	-	-	-
no					-	TRUE	TRUE	TRUE	-
No.					TRUE	TRUE	-	TRUE	-
No					TRUE	TRUE	TRUE	TRUE	-
yes					-	TRUE	TRUE	TRUE	This would change if I wouldnt be in such a "rich" lab
No					TRUE	TRUE	-	-	-
-					TRUE	TRUE	TRUE	TRUE	-
no					TRUE	TRUE	-	TRUE	-
Yes					TRUE	TRUE	TRUE	-	-
no					TRUE	-	-	TRUE	-
no					TRUE	TRUE	TRUE	TRUE	-
no					-	-	-	TRUE	-
no					-	TRUE	-	TRUE	-
no					-	-	-	-	-
No					-	-	TRUE	TRUE	-
-					TRUE	TRUE	TRUE	-	-
No					TRUE	TRUE	-	TRUE	-
yes					-	TRUE	-	-	-
No					TRUE	TRUE	-	-	-
-					TRUE	TRUE	TRUE	-	-
no					TRUE	TRUE	-	-	-
-					TRUE	TRUE	-	-	-
No					TRUE	TRUE	TRUE	-	-
no					-	-	TRUE	-	-
no					-	-	-	TRUE	-
-					-	-	TRUE	-	-
yes					-	TRUE	TRUE	-	-
Yes					-	TRUE	-	-	-
no					-	-	-	-	-
no					-	TRUE	TRUE	TRUE	-
yes					TRUE	TRUE	-	-	-
No					-	TRUE	TRUE	TRUE	-
no					TRUE	TRUE	-	-	-
-					TRUE	TRUE	TRUE	-	-
-					TRUE	TRUE	TRUE	TRUE	-
no					TRUE	TRUE	-	TRUE	-
No					TRUE	TRUE	TRUE	-	-
no					-	TRUE	TRUE	-	-
no					TRUE	TRUE	-	-	-
No					-	-	-	TRUE	-
No					TRUE	TRUE	-	-	-
-					TRUE	TRUE	-	-	-
no					-	-	-	TRUE	-
no					TRUE	TRUE	-	-	-
no					-	TRUE	TRUE	TRUE	-
yes					-	TRUE	TRUE	-	I like traveling by train for the comfort, but for many occasions it is taking quite a few hours and the DB is unreliable.
no					TRUE	TRUE	TRUE	-	-
no					TRUE	-	-	TRUE	-
no					TRUE	TRUE	TRUE	TRUE	-
no					-	-	-	-	TRUE
No					TRUE	TRUE	TRUE	-	-
no					-	TRUE	TRUE	TRUE	-
no					-	TRUE	-	-	-
No					-	TRUE	-	-	-
no					-	TRUE	-	-	-
No					TRUE	TRUE	TRUE	-	-
-					TRUE	-	-	TRUE	-
yes					-	TRUE	-	TRUE	-
no					-	TRUE	TRUE	-	-
no					-	TRUE	-	-	-
No					TRUE	-	-	-	If possible I ise train if it doesn't prolong my journey too much.
-					-	-	TRUE	TRUE	-
-					-	TRUE	-	TRUE	-
yes					-	TRUE	-	TRUE	-
no					-	TRUE	-	TRUE	-
yes					-	-	-	TRUE	I have a fear of flying - this is becoming less of a problem as flying becomes less acceptable.
no					TRUE	TRUE	-	TRUE	-
Yes					TRUE	TRUE	-	TRUE	-
-					-	TRUE	-	-	-
no					-	-	-	TRUE	-
No					TRUE	TRUE	-	TRUE	-
No					-	-	-	TRUE	-
no					-	-	TRUE	TRUE	-
no					-	TRUE	TRUE	TRUE	-
yes					-	-	-	TRUE	-
No					TRUE	TRUE	TRUE	TRUE	-
-					-	TRUE	TRUE	TRUE	-
yes					-	TRUE	TRUE	TRUE	-
yes					TRUE	TRUE	TRUE	TRUE	-
Yes					-	-	TRUE	-	-
yes					-	-	-	TRUE	-
yes					TRUE	TRUE	TRUE	TRUE	-
no					-	TRUE	-	-	-
yes					-	-	-	TRUE	-
no					-	-	-	-	University policy
no					-	TRUE	-	TRUE	-
Yes.					-	-	-	-	-
No					-	-	TRUE	TRUE	-
yes					-	-	-	TRUE	-
no					-	TRUE	-	-	-
yes					-	-	-	TRUE	-
No					-	TRUE	TRUE	TRUE	-
No					-	-	TRUE	TRUE	-
yes					TRUE	TRUE	TRUE	-	-
no					-	TRUE	-	-	-
No					-	TRUE	TRUE	-	-
Yes					-	-	TRUE	TRUE	I had 3 project meetings on another continent where I had to take the plane. Within Europe I only took the train.
yes					-	-	-	-	The one which is possible in each context to preserve environment
no					-	TRUE	-	-	-
No					-	TRUE	-	TRUE	-
yes					-	TRUE	-	TRUE	supervisors decision
no					TRUE	TRUE	TRUE	-	-
no					TRUE	TRUE	-	TRUE	-
no					-	TRUE	-	-	-
no					TRUE	TRUE	TRUE	TRUE	-
no					-	TRUE	-	TRUE	-
yes					-	TRUE	TRUE	-	-
yes					TRUE	TRUE	TRUE	TRUE	-
no					-	TRUE	-	-	-
no					-	TRUE	TRUE	TRUE	-
no					-	TRUE	TRUE	-	-
No.					TRUE	TRUE	TRUE	-	Only posibility
no					TRUE	TRUE	-	TRUE	-
no					-	TRUE	TRUE	-	-
No					-	TRUE	-	-	-
-					TRUE	TRUE	TRUE	TRUE	-
No					TRUE	TRUE	TRUE	TRUE	-
yes					-	TRUE	-	-	-
no					-	TRUE	-	-	-
Yes					TRUE	TRUE	TRUE	TRUE	-
Yes					-	TRUE	TRUE	TRUE	-
no					-	-	-	TRUE	-
yes					TRUE	TRUE	TRUE	TRUE	-
no					-	TRUE	-	-	-
-					-	TRUE	-	-	-
yes					-	-	-	TRUE	-
yes					-	TRUE	-	TRUE	-
yes					-	TRUE	-	TRUE	-
-					-	-	-	TRUE	-
yes					-	TRUE	-	TRUE	-
yes					-	TRUE	-	TRUE	-
yes					TRUE	TRUE	TRUE	TRUE	-
no					-	-	-	-	easiest, stressfree way of transportation
No					-	TRUE	-	-	-
yes					TRUE	-	TRUE	TRUE	-
no					-	-	TRUE	-	-
No					-	-	-	-	-
-					-	TRUE	-	TRUE	-
Yes					-	TRUE	TRUE	TRUE	-
No					-	TRUE	TRUE	-	-
no					TRUE	TRUE	TRUE	-	-
no					-	TRUE	TRUE	-	-
yes					-	-	TRUE	-	-
yes					-	-	TRUE	TRUE	-
no					-	TRUE	-	-	-
-					-	TRUE	-	-	-
no					-	TRUE	-	-	-
-					-	TRUE	-	TRUE	-
No					-	-	-	TRUE	-
No					-	-	TRUE	TRUE	-
yes					-	TRUE	-	TRUE	-
-					TRUE	-	TRUE	TRUE	-
yes.					-	TRUE	TRUE	-	-
No					-	-	-	-	The institute policy
no					TRUE	-	-	-	-
-					-	-	TRUE	TRUE	-
no					-	-	-	TRUE	-
No					TRUE	TRUE	TRUE	-	-
yes					-	TRUE	-	-	-
Yes					TRUE	TRUE	-	TRUE	-
yes					TRUE	TRUE	-	TRUE	-
yes					-	-	-	TRUE	-
yes					-	-	TRUE	-	-
yes					-	TRUE	-	-	-
yes					-	-	TRUE	TRUE	-
yes					-	TRUE	-	-	-
no					TRUE	TRUE	TRUE	TRUE	-
yes					TRUE	TRUE	-	-	-
No					-	TRUE	-	-	-
yes					-	TRUE	TRUE	TRUE	-
yes.					TRUE	TRUE	-	TRUE	-
no					TRUE	-	-	-	-
No					TRUE	TRUE	TRUE	TRUE	-
no idea					-	TRUE	-	-	When the destination is not too far, I would like to choose bus or train. However, it is too far, aircraft is a better choice.
yes					-	TRUE	TRUE	TRUE	Time of return: not possible after a certain time (night) with public transport
no					TRUE	TRUE	TRUE	-	Locations not accessible via train or public transport
yes					-	-	TRUE	TRUE	-
no					TRUE	TRUE	-	-	-
yes					-	-	-	TRUE	-
no					-	TRUE	-	-	-
yes					-	-	TRUE	TRUE	-
yes					TRUE	TRUE	-	TRUE	We unfortunately need to take the cheapest option, which unfortunately means for continental trips, flying is often the by far the cheapest.
Yes					-	TRUE	-	-	-
no					-	TRUE	-	-	-
yes					-	-	TRUE	TRUE	-
no					-	-	TRUE	TRUE	-
yes					-	TRUE	TRUE	TRUE	-
yes					-	-	TRUE	TRUE	-
no					-	TRUE	-	TRUE	-
Yes					TRUE	TRUE	TRUE	TRUE	-
-					-	-	-	TRUE	-
yes					TRUE	-	TRUE	TRUE	-
yes					TRUE	TRUE	TRUE	TRUE	-
yes					TRUE	TRUE	-	TRUE	-
yes					-	TRUE	TRUE	TRUE	-
yes					TRUE	TRUE	TRUE	TRUE	-
no					TRUE	TRUE	-	-	-
-					-	-	-	TRUE	-
no					TRUE	TRUE	TRUE	TRUE	-
Yes.					-	-	-	-	It's cross continental. Flying is the only option.
No					TRUE	-	-	-	-
Yes					-	-	-	TRUE	-
No					TRUE	TRUE	-	-	-

## Sheet: R_Networking
Q17 - Would you say that attending all of the scientific meetings/conferences this year was essential for your career/networking?							Q18 - Would you be willing to reduce the amount of travelling for your science for the sake of the environment/reducing your personal carbon emission?					Q19 - How important do you consider face to face discussions/networking for the scientific community? (Importance)
yes, true for all of them							-					4
yes, true for some of them		Essential meetings					yes	yes	144	0.634361	63.4	4		Networking Importance
yes, true for some of them		yes, true for all of them	112	0.493392	49.3		yes	no	67	0.295154	29.5	3	AV	4.23556
yes, true for all of them		yes, true for some of them	86	0.378855	37.9		yes	prefer not to say	2	0.00881057	0.9	5
yes, true for all of them		no	27	0.118943	11.9		no	other	14	0.061674	6.2	5		1	1	0.00440529	0.4
-		prefer not to say	2	0.00881057	0.9		-		227		100	4		2	6	0.0264317	2.6
yes, true for some of them			227		100		yes					2		3	25	0.110132	11
yes, true for all of them							yes	Reduce travels				4		4	100	0.440529	44.1
yes, true for all of them							no					4		5	93	0.409692	41	85.1
yes, true for all of them							no					4		n/A	2	0.00881057	0.9
yes, true for all of them							no					5			227		100
yes, true for all of them							yes					4
yes, true for all of them							no					5
yes, true for some of them							yes					4
yes, true for some of them							yes					5
yes, true for all of them							no					4
yes, true for some of them							yes					5
yes, true for some of them							yes					4
yes, true for all of them							no					5
no							yes					5
yes, true for all of them							yes					4
yes, true for all of them							-					5
yes, true for all of them							no					5
no							yes					5
yes, true for some of them							yes					4
yes, true for some of them							prefer not to say					5
-							yes					4
yes, true for some of them							yes					2
yes, true for some of them							yes					5
yes, true for all of them							no					5
yes, true for all of them							yes					5
yes, true for some of them							no					5
yes, true for all of them							no					5
no							yes					5
yes, true for all of them							no					5
no							yes					5
yes, true for all of them							yes					3
-							other:I did it this year. No conferense visted,					2
yes, true for some of them							yes					4
yes, true for some of them							no					4
yes, true for all of them							no					5
yes, true for all of them							yes					5
yes, true for all of them							no					5
yes, true for some of them							yes					4
yes, true for all of them							no					5
yes, true for all of them							yes					4
yes, true for some of them							no					4
yes, true for some of them							no					5
yes, true for some of them							yes					3
yes, true for all of them							yes					4
-							yes					4
yes, true for all of them							yes					5
yes, true for all of them							no					5
no							yes					2
yes, true for all of them							yes					4
yes, true for all of them							no					4
yes, true for some of them							no					4
-							-					4
yes, true for some of them							yes					4
yes, true for all of them							yes					5
yes, true for all of them							yes					5
no							yes					4
yes, true for all of them							no					5
yes, true for some of them							yes					4
yes, true for all of them							yes					5
yes, true for some of them							no					4
no							yes					1
yes, true for all of them							no					4
prefer not to say							yes					5
yes, true for all of them							no					5
yes, true for all of them							yes					3
yes, true for some of them							yes					5
no							yes					4
no							other:was not travelling at all for work					3
yes, true for some of them							no					5
yes, true for some of them							yes					4
yes, true for all of them							yes					4
yes, true for some of them							yes					5
yes, true for some of them							yes					4
yes, true for some of them							no					4
yes, true for all of them							yes					4
yes, true for all of them							other:I already reduced the meetings and I avoid long Distance flights					5
prefer not to say							no					4
yes, true for all of them							no					-
yes, true for all of them							yes					5
yes, true for all of them							no					4
yes, true for all of them							yes					4
yes, true for some of them							yes					4
yes, true for all of them							yes					4
yes, true for some of them							other:I would find it difficult to forego the face-to-face networking that takes places during the informal conference spaces.					5
yes, true for some of them							yes					3
yes, true for some of them							yes					2
yes, true for some of them							no					5
yes, true for some of them							yes					5
yes, true for some of them							yes					4
yes, true for all of them							yes					4
yes, true for all of them							no					5
yes, true for all of them							no					5
yes, true for all of them							yes					4
no							yes					3
no							yes					4
yes, true for some of them							yes					4
yes, true for all of them							no					4
no							no					4
yes, true for all of them							yes					3
yes, true for all of them							other:if it doesn't affect my carreer plans					5
yes, true for some of them							yes					5
yes, true for some of them							yes					5
yes, true for all of them							yes					4
yes, true for some of them							yes					3
-							other:I would be willing to change the mode of transport (train instead of plane)					5
yes, true for all of them							yes					5
no							yes					4
yes, true for all of them							yes					4
no							other:I reduced it already and did not join					-
yes, true for all of them							no					4
yes, true for some of them							no					5
yes, true for all of them							no					5
yes, true for all of them							no					5
yes, true for some of them							no					5
yes, true for some of them							yes					4
yes, true for some of them							yes					5
yes, true for all of them							yes					4
yes, true for all of them							yes					4
yes, true for all of them							yes					5
yes, true for some of them							yes					4
yes, true for some of them							no					4
yes, true for all of them							no					5
yes, true for some of them							yes					5
yes, true for all of them							yes					4
yes, true for some of them							no					5
yes, true for all of them							yes					4
yes, true for all of them							yes					4
no							yes					4
yes, true for some of them							no					5
yes, true for all of them							no					3
yes, true for some of them							yes					3
yes, true for all of them							yes					5
no							yes					5
yes, true for all of them							yes					4
yes, true for some of them							other:if there would be the possibility to attend via live stream, yes					5
yes, true for all of them							yes					5
yes, true for all of them							no					5
yes, true for all of them							yes					5
yes, true for all of them							yes					4
yes, true for some of them							no					4
yes, true for some of them							no					4
yes, true for all of them							yes					4
yes, true for all of them							yes					4
yes, true for all of them							yes					4
yes, true for all of them							other:Yes, have already done so.					5
yes, true for some of them							yes					4
no							yes					3
yes, true for all of them							yes					4
yes, true for all of them							yes					4
yes, true for all of them							yes					5
yes, true for all of them							other:not really, all conferences/meeting I attend are essential. I can't skip or reduce them.					5
yes, true for some of them							yes					5
no							yes					4
yes, true for all of them							no					2
-							yes					3
yes, true for all of them							yes					4
yes, true for some of them							yes					4
yes, true for all of them							yes					5
yes, true for some of them							yes					4
yes, true for all of them							no					4
yes, true for all of them							no					3
yes, true for some of them							yes					4
yes, true for some of them							yes					5
yes, true for all of them							yes					4
yes, true for all of them							yes					4
yes, true for some of them							yes					5
yes, true for all of them							yes					5
yes, true for some of them							yes					4
yes, true for all of them							yes					4
yes, true for all of them							yes					4
yes, true for all of them							yes					5
yes, true for all of them							no					5
yes, true for all of them							no					5
yes, true for some of them							yes					4
yes, true for all of them							other:Yes, and this year I did not travel to one international conference in Japan precisely because the added value of this conference for me did not counterbalance the negative consequences for the environment					4
yes, true for all of them							no					5
yes, true for some of them							no					5
yes, true for some of them							yes					5
yes, true for all of them							yes					5
yes, true for some of them							yes					5
yes, true for some of them							yes					4
yes, true for some of them							yes					4
yes, true for some of them							yes					5
yes, true for all of them							no					4
yes, true for some of them							yes					3
yes, true for some of them							yes					4
yes, true for all of them							no					5
yes, true for all of them							yes					3
yes, true for all of them							yes					5
yes, true for some of them							yes					4
yes, true for some of them							yes					4
yes, true for all of them							no					3
yes, true for some of them							no					4
yes, true for some of them							other:I have cut down from previous years and will keep trying					5
yes, true for some of them							other:Yes, if attending those conferences/meetings would be possible via internet (live-streaming).					4
yes, true for some of them							no					4
yes, true for some of them							yes					3
yes, true for some of them							no					5
yes, true for some of them							yes					3
yes, true for all of them							yes					5
yes, true for all of them							yes					4
yes, true for some of them							yes					4
yes, true for all of them							yes					4
yes, true for all of them							yes					4
yes, true for all of them							other:Need to go to maintain instruments					3
yes, true for some of them							yes					4
yes, true for all of them							yes					3
no							yes					5
yes, true for some of them							yes					3
yes, true for some of them							yes					5
no							yes					4
yes, true for all of them							yes					5
yes, true for some of them							yes					4
yes, true for all of them							prefer not to say					5
yes, true for some of them							no					3
yes, true for all of them							yes					5
yes, true for all of them							no					5
yes, true for some of them							yes					3
yes, true for some of them							yes					4
yes, true for all of them							yes					5
yes, true for all of them							yes					3

## Sheet: R_Alternatives
Q20 - Could you imagine alternative web-based concepts of scientific meetings/conferences in the future?
yes
yes
other:Video calls, online posters, online seminars and scientific talks
no
yes			yes	148	0.651982	65.2
yes			no	52	0.229075	22.9
yes			other	27	0.118943	11.9
yes				227		100
other:It dep
yes			Alternative concepts
no
yes
yes
yes
yes
no
yes
yes
other:as alternative, but not a complete replacement
no
no
-
yes
no
yes
no
yes
yes
yes
other:Partially, but nothing replaces face to face interaction
no
yes
no
yes
other:Yes, these initiatives exist for certain types of conferences. However, it's hard to properly network in these events, since people are not in the same place and it's difficult to create an atmosphere of a real conference.
yes
yes
yes
yes
yes
yes
yes
no
yes
yes
yes
other:Some of them
no
yes
yes
yes
yes
yes
yes
yes
-
yes
-
other:partially
no
no
yes
no
yes
yes
yes
yes
no
other:mh dont know
yes
yes
no
no
yes
yes
no
yes
yes
other:I could but not with the way Skype and such are running currently. The quality is too poor and the problems (like randomly being thrown out of the conversation and such) are too frequent
no
yes
yes
other:i can imagine them, but for me personally the face-to-face format is MUCH more effective
no
yes
other:maybe
yes
yes
other:it depends, not for all meetings
other:Not really - I would feel I would be missing out on the face to face contact.
yes
yes
no
yes
yes
no
no
yes
yes
yes
no
yes
yes
yes
yes
yes
no
yes
yes
yes
other:Would have to be much better than just Skype, though, and requires good internet everywhere.
other:At least one initial meeting is required to get to know oneanother and from initial bonds
yes
yes
yes
no
yes
no
yes
no
yes
yes
yes
yes
yes
yes
yes
other:Do not substitute face to face meetings
other:only in projects, when knowing the other participants. Webinars e.g. are always something I negelct because "more important things" occur.
yes
no
other:maybe
yes
yes
yes
no
yes
no
no
yes
yes
yes
no
other:In certain situation, when only theoretical discussion is taking place.
yes
no
no
yes
yes
no
other:Yes, but not as the only solution. Face-to-face meetings are still essential to build relationships of trust. Annual conferences could, perhaps, alternate between physical and web meeting every other year. Projects could have a physical kick-off meeting and virtual working meetings as the project progresses (the latter already happens in a number of projects, especially international ones).
yes
yes
yes
no
yes
no
yes
yes
yes
yes
yes
yes
yes
yes
no
yes
yes
yes
yes
yes
other:Partly yes! I think we cannot go without any face to face meetings, but it should be possible to reduce them a lot
no
yes
yes
yes
yes
no
other:Yes, but one alternative web-based meetings can not substitute for face-to-face discussions
yes
yes
no
other:this is what I do mostly, but sometimes face-to-face meetings are inevitable
yes
yes
yes
yes
yes
yes
yes
yes
yes
no
yes
yes
yes
yes
no
no
other:Yes, but I have not yet experienced good alternatives
yes
yes
yes
no
yes
yes
yes
yes
yes
yes
yes
yes
yes
no
yes
yes
other:I wish I could. I try to prevent travel and replace it by e.g. Skype meetings and the like, but this is not fully satisfatory.
yes
other:but not exclusively, I consider personal contact very important (but the events should be kept to a minimum))
other:web-based meetings might replace some, but not all of the conference travels
yes
no
no
yes
yes
yes
yes
