# Supplementary material for: A survey of travel behaviour among scientists in Germany and the potential for change
Source: eLife. 2020 May 28;9:e56765. doi: 10.7554/eLife.56765 (PMC7255798; doi:10.7554/eLife.56765)
Supplement: Figure 4—source data 1. [file elife-56765-fig4-data1.xlsx]

## Sheet: R_Travel behavior
Q1 - Before getting started, would you say that the environment/climate change affects your travelling behavior?
yes
yes
partially		yes	96	0.422907	42.3
yes		partially	99	0.436123	43.6	85.9
no		no	31	0.136564	13.7
partially		i dont care	1	0.00440529	0.4
partially			227	1	100
no
yes
yes
partially
partially
no
yes
yes
partially
partially
yes
partially
yes
partially
partially
no
partially
yes
partially
yes
yes
partially
partially
yes
partially
no
yes
partially
yes
yes
yes
yes
partially
yes
partially
no
no
partially
yes
no
no
yes
partially
partially
yes
no
partially
no
partially
partially
partially
partially
partially
partially
no
partially
yes
no
partially
yes
no
yes
partially
partially
yes
yes
partially
no
yes
partially
partially
partially
no
yes
yes
partially
partially
yes
yes
yes
yes
partially
partially
yes
yes
no
yes
yes
yes
partially
yes
yes
yes
yes
partially
partially
yes
yes
partially
partially
yes
partially
yes
partially
yes
yes
no
yes
partially
partially
partially
partially
i don´t care
yes
yes
partially
yes
yes
no
partially
no
yes
yes
partially
yes
partially
yes
no
no
yes
partially
yes
yes
partially
partially
yes
yes
partially
yes
partially
partially
yes
yes
yes
yes
partially
yes
partially
partially
partially
partially
partially
yes
partially
yes
partially
partially
yes
yes
yes
yes
partially
partially
partially
yes
partially
partially
partially
yes
partially
no
partially
partially
yes
no
partially
partially
yes
yes
partially
yes
yes
no
yes
yes
no
yes
partially
partially
yes
partially
partially
partially
yes
partially
partially
no
yes
yes
yes
partially
partially
partially
yes
yes
partially
no
partially
yes
yes
partially
partially
partially
no
yes
partially
no
partially
yes
no

## Sheet: R_Number of flights
Q22 - How many flights (roundtrips) have you taken this year?
0
0
0		AV
0		3.10398
0
9		18
5
18
10
1
8
10
8
4
1
4
10
5
5
3
4
6
7
3
3
2
4
3
3
5
6
3
5
1
3
4
3
0
1.5
6
2
6
3
4
5
0
1
8
1
4
6
1.5
10
1
4
5
4
3
13
1
6.5
8
6
0
8
8
4
7
1
2
1
5
4
6
1
0
3
7
2
6
2
4
5
5
1
1
3
2
1
0
1
2
2
1
0
0
1
2
0
1
2
2
2
0
2
1
0
0
2
0
2
0
0
7
0
1
1
0
2
10
3
2
4
5
1
10
1
8
0
4
5
0
4
0
8
6
1
2
3
4
4
1
2
2
3
2
3
12
6
0
0
1
0
1
3
1
2
4
1
1
0
1
0
5
5
1
2
0
4
3
3
1.5
0
0
6
0
1
7
6
0
4
8
3
0
2
0
4
3
2
8
0.5
4
13
2
4
0
0
1
9
0
6
3
6
1
2
1
3
1
2
2
0
0
4
0
2
2
2
1
0
4
0
2
2
10
2
1

## Sheet: R_Diet
Q21 - What is your preferred diet?
Flexitarian
Other:Ahahah what?		Diet
Vegetarian		Vegan	12	0.0528634	5.3
Flexitarian		Vegetarian	59	0.259912	26
Flexitarian		Flexitarian	107	0.471366	47.1
Flexitarian		Meat-based	35	0.154185	15.4
Flexitarian		Other	14	0.061674	6.2
Meat-based			227		100
Meat-based
Flexitarian
Flexitarian
Other:omnivorous
Meat-based
Vegetarian
Vegetarian
Meat-based
Vegetarian
Flexitarian
Flexitarian
Vegetarian
Meat-based
Meat-based
Meat-based
Meat-based
Vegetarian
Other:I do eat meat once in a while, but I wouldn't say my diet is based on meat, it is based on veggies, but I am not a strict vegetarian
Flexitarian
Vegan
Flexitarian
Meat-based
Flexitarian
Meat-based
Other:Reduced meat consumption
Vegan
Meat-based
Vegan
Vegetarian
Flexitarian
Vegetarian
Meat-based
Flexitarian
Flexitarian
Vegan
Vegetarian
Flexitarian
Flexitarian
Vegetarian
Meat-based
Vegetarian
Flexitarian
Flexitarian
Flexitarian
Vegetarian
Flexitarian
Flexitarian
Vegetarian
Other:mediterranean
Flexitarian
Vegan
Other:whatever I fancy
Meat-based
Flexitarian
Vegetarian
Vegan
Vegetarian
Meat-based
Flexitarian
Meat-based
Flexitarian
Meat-based
Meat-based
Flexitarian
Flexitarian
Other
Flexitarian
Flexitarian
Flexitarian
Vegetarian
Flexitarian
Flexitarian
Flexitarian
Flexitarian
Vegetarian
Vegetarian
Flexitarian
Vegetarian
Flexitarian
Vegetarian
Vegetarian
Flexitarian
Vegetarian
Meat-based
Flexitarian
Flexitarian
Vegetarian
Vegan
Flexitarian
Meat-based
Flexitarian
Vegan
Flexitarian
Vegetarian
Other:I eat everything (that has been killed and prepared), but I try to be responsible about food sources and amount of meat.
Flexitarian
Flexitarian
Flexitarian
Flexitarian
Vegetarian
Meat-based
Flexitarian
Flexitarian
Vegetarian
Vegan
Other
Other:I prefer local food
Meat-based
Flexitarian
Flexitarian
Vegetarian
Meat-based
Flexitarian
Vegetarian
Flexitarian
Flexitarian
Vegetarian
Flexitarian
Flexitarian
Meat-based
Flexitarian
Flexitarian
Meat-based
Flexitarian
Flexitarian
Flexitarian
Flexitarian
Meat-based
Vegetarian
Vegetarian
Flexitarian
Flexitarian
Flexitarian
Flexitarian
Flexitarian
Flexitarian
Meat-based
Vegan
Flexitarian
Flexitarian
Flexitarian
Vegetarian
Vegetarian
Vegetarian
Vegetarian
Flexitarian
Flexitarian
Flexitarian
Flexitarian
Vegetarian
Vegetarian
Vegetarian
Flexitarian
Vegetarian
Vegetarian
Flexitarian
Flexitarian
Vegetarian
Flexitarian
Flexitarian
Vegetarian
Flexitarian
Vegetarian
Flexitarian
Flexitarian
Flexitarian
Flexitarian
Vegetarian
Meat-based
Flexitarian
Flexitarian
Vegetarian
Meat-based
Flexitarian
Meat-based
Flexitarian
Flexitarian
Vegetarian
Vegetarian
Flexitarian
Vegetarian
Vegetarian
Vegetarian
Flexitarian
Other:Pescatarian
Vegan
Flexitarian
Flexitarian
Vegan
Other
Vegetarian
Meat-based
Flexitarian
Flexitarian
Flexitarian
Flexitarian
Flexitarian
Flexitarian
Flexitarian
Other
Flexitarian
Flexitarian
Vegetarian
Vegetarian
Meat-based
Vegetarian
Vegetarian
Vegetarian
Flexitarian
Vegetarian
Flexitarian
Other
Flexitarian
Vegetarian
Vegetarian
Meat-based
Meat-based
Flexitarian
Meat-based
